# Supplementary material
Source: Springer Nature journal article supplement (https://www.springermedizin.de/resource/supplementary/13041_2014_291_MOESM16_ESM.pdf/25657922)
Supplement: MOESM16 [file 25657922]

Table 2

|                         | Controls     | Mutants     | p value |
|-------------------------|--------------|-------------|---------|
| <i>Pyramidal cells</i>  |              |             |         |
| Mean firing rate (Hz)   | 1.22 ± 0.14  | 1.16 ± 0.21 | 0.76    |
| Spike width (μs)        | 691 ± 64.4   | 685 ± 69.4  | 0.31    |
| Fano factor (100ms bin) | 1.54 ± 0.052 | 1.44 ± 0.67 | 0.67    |
| <i>Interneurons</i>     |              |             |         |
| Mean firing rate (Hz)   | 22.7 ± 9.4   | 29.8 ± 17.5 | 0.63    |
| Spike width (μs)        | 236 ± 45.2   | 246 ± 41.6  | 0.69    |
